# Supplementary material for: Polyvinylpyrrolidone stabilized-Ru nanoclusters loaded onto reduced graphene oxide as high active catalyst for hydrogen evolution
Source: Springer Nature journal article supplement (doi:10.1007/s11051-017-3924-5), 2017-06-01
Supplement: MOESM1 [file 12460892]

Supplementary Materials for

Polyvinylpyrrolidone stabilized-Ru nanoclusters loaded onto reduced graphene oxide as high active catalyst for hydrogen evolution

Jiao Zhanga, Jinghao Haob, Qianli Maa, Chuanqi Lia, Yushan Liua, Baojun Li,*,a and Zhongyi Liu*,a

a School of Chemistry and Molecular Engineering, Zhengzhou University, 100 Kexue avenue, Zhengzhou 450001, P R China

b Department of Quality Examination and Management, Henan University of Animal Husbandry and Economy, Zhengzhou 450011, P. R. China

* Corresponding Authors. Email: liuzhongyi@zzu.edu.cn and lbjfcl@zzu.edu.cn


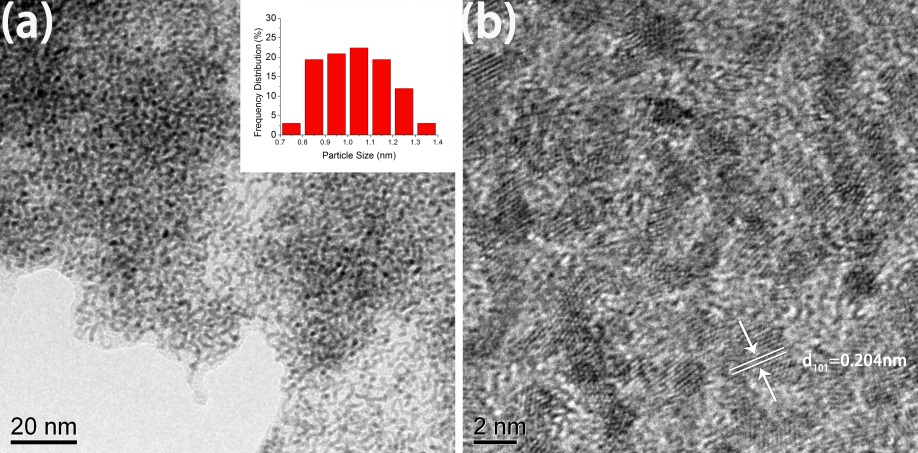


**Fig. S1** **a** TEM and **b** HRTEM images of the PVP stabilized-Ru nanoclusters. Particle size distribution was inserted into **a**


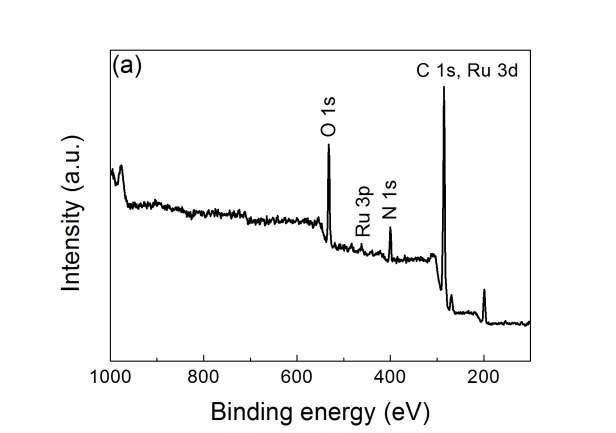

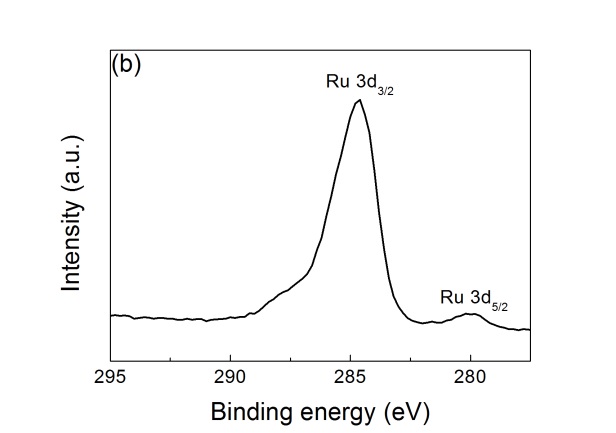


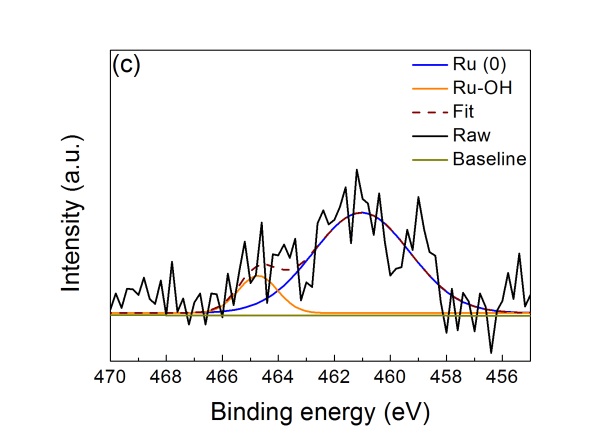


**Fig. S2** XPS pattern of as-prepared Polyvinylpyrrolidone stabilized-Ru nanoclusters: **a** survey scan, **b** Ru 3d, **c** Ru 3p.

**Synthesis of Ru/rGO catalyst with different contain of GO**:

0 g, 0.1637 g, 0.4928 g, 0.9866 g and 1.4700 g GO powder were dispersed in 50 mL distilled water to form a uniform aqueous suspension under ultrasonic bath with agitating for 4 h. Then 50 mL black colloidal Ru solution mentioned above was added into the beaker (250 mL). The self-assembly process was carried out at room temperature under magnetic stirring at 500 rpm for another 1 h. The catalysts with different graphene contents (0%, 25%, 50%, 66.7%, and 75% ) were obtained.

**Error analysis:**

Error analysis was performed as follows: Taking 1 ml and 10 mL catalyst of Ru/rGO by suction pipets into five clean empty bottles, respectively. Then remove the solvent in the oven. The amounts of catalyst were determined by weighing the bottle mass before and after the catalysts added. The results were summarized in Table S1.

**Table S1.** The comparison of 1 and 10 mL of Ru/rGO NCs suspension taken 5 times in parallel.

| Code | *m0* (g) | *m1* (g) | *△m* (g) | (g) | Catalyst volume (mL) | Relative deviation (%) |
| --- | --- | --- | --- | --- | --- | --- |
| 1 | 4.7072 | 4.7370 | 0.0298 | 0.02974 | 1 | 0.3 |
| 2 | 4.6006 | 4.6303 | 0.0297 | 1 |
| 3 | 4.6380 | 4.6676 | 0.0296 | 1 |
| 4 | 6.4568 | 6.4865 | 0.0297 | 1 |
| 5 | 6.5699 | 6.5998 | 0.0299 | 1 |  |
| 6 | 16.5981 | 16.8956 | 0.2975 | 0. 2976 | 10 | 0.3 |
| 7 | 16.3797 | 16.6784 | 0.2987 | 10 |
| 8 | 16.5526 | 16.8495 | 0.2969 | 10 |
| 9 | 16.7638 | 17.0599 | 0.2961 | 10 |
| 10 | 16.4019 | 16.7008 | 0.2989 | 10 |

*m0*: The mass of empty bottles.

*m1*: The mass of bottles after the catalyst added being dried.

**
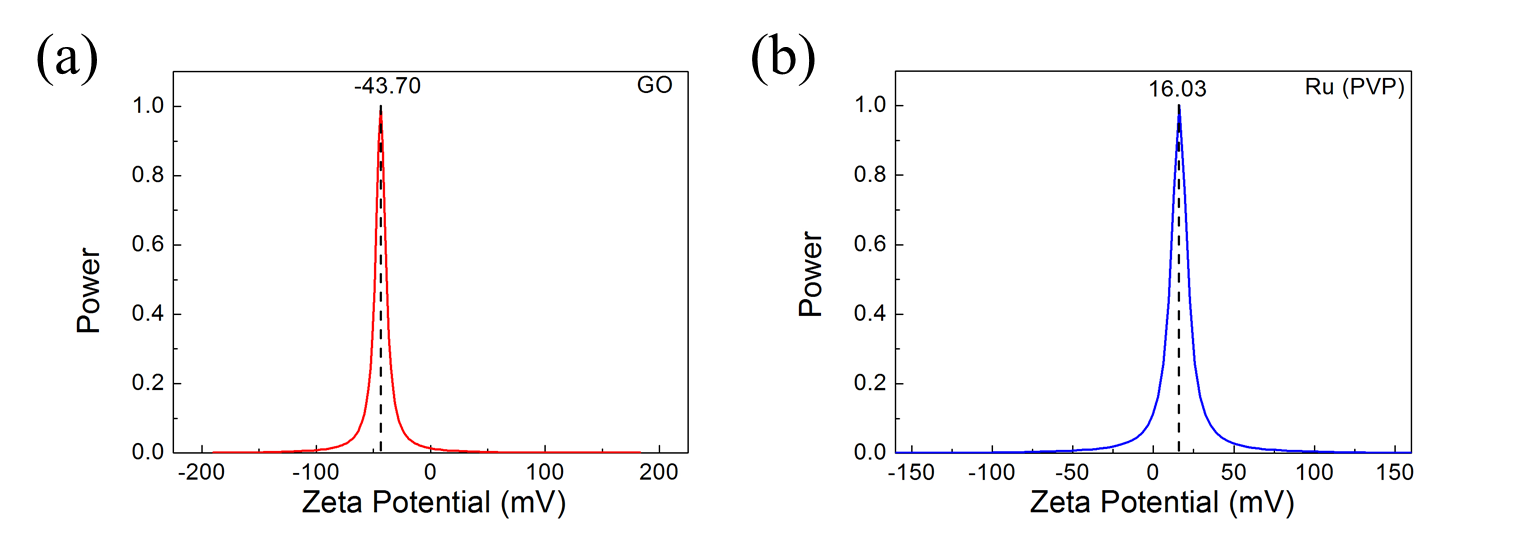
**

**Fig. S3** Zeta Potential of **a** GO and **b** Ru (PVP) nanoclusters dispersing solution

**
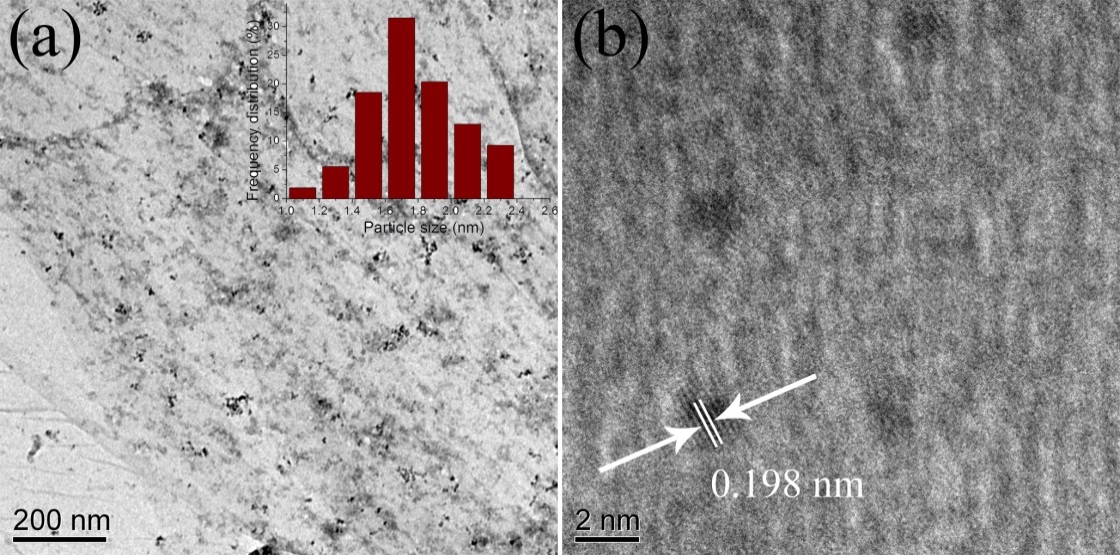
**

**Fig. S4** **a** TEM and **b** HRTEM images of Ru/rGO composites at the end of fifth run in the hydrolysis of NaBH4. Particle size distributions of the Ru/rGO NCs recycled five times was inserted in Fig. S4a


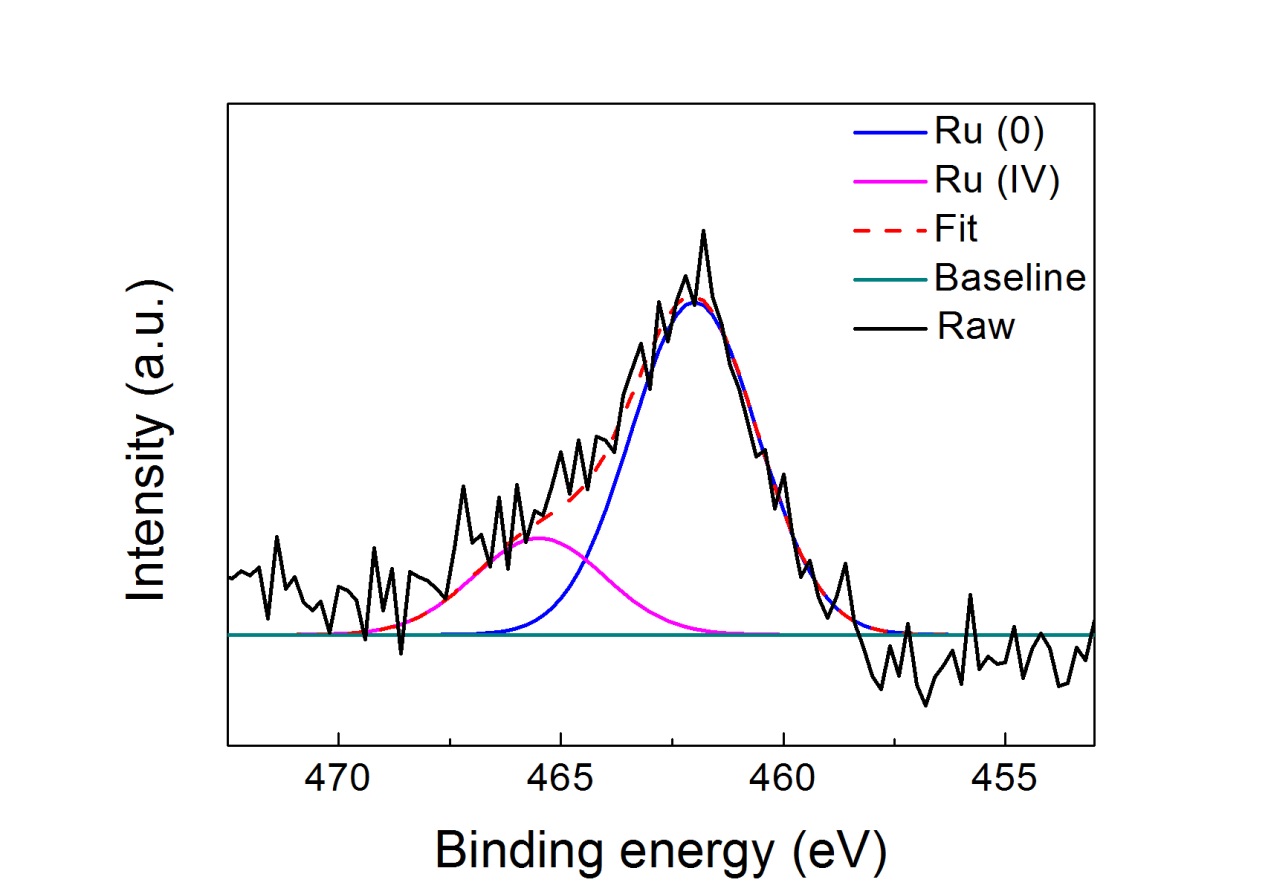


**Fig. S5** XPS pattern of Ru species of Ru/rGO NCs after 5 cycles
